# Supplementary material for: DendroBLAST: Approximate Phylogenetic Trees in the Absence of Multiple Sequence Alignments
Source: PubMed Central journal article supplement (PMC3598851; doi:10.1371/journal.pone.0058537), 2013-03-15
Supplement: pone.0058537.s002.pdf [file pone.0058537.s002.pdf]

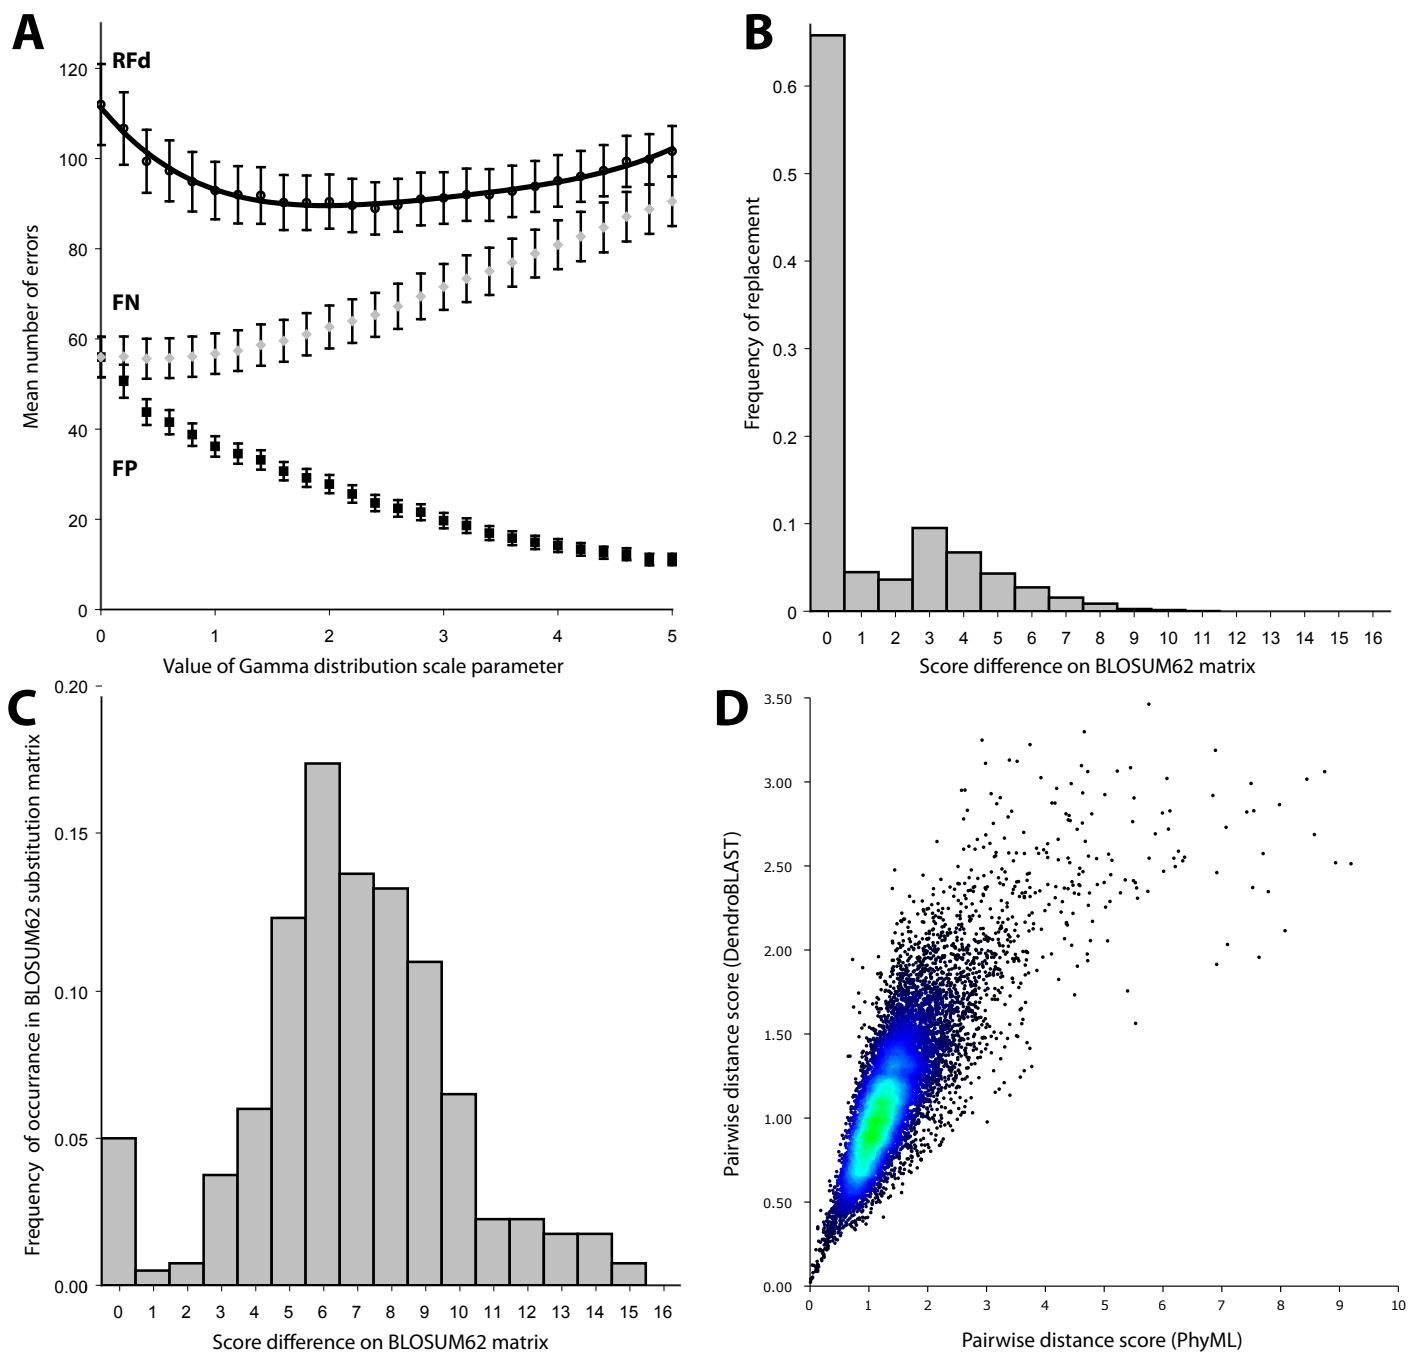

**Figure S2:** Optimising the scale of the Gamma distribution. **A)** Plot of the effect of varying the Gamma distribution scale factor on the false positive partitions, false negative partitions and Robinson-Foulds distance. Value at 0 is estimated from 100 replicates with no amino acid replacement. Black line indicates the fitted polynomial model, the local optimum for Gamma scale value is 1.9644. Error bars indicate 1 standard error of the mean. **B)** The frequency of the amino acid changes for a 100 replicate DendroBLAST inference using the optimal Gamma scale parameter. For example, a value of 0 indicates that the amino acid was not changed. A value of 1 indicates that the amino acid was changed to an amino acid which has a score of 1 less than the score for not changing in the BLOSUM62 substitution matrix. **C)** The distribution of score values in the remapped BLOSUM62 substitution matrix. **D)** Comparison of pairwise distances computed by DendroBLAST and by PhyML using 4 gamma rate categories.
